# Supplementary material for: Reactivity, photolability, and computational studies of the ruthenium nitrosyl complex with a substituted cyclam fac-[Ru(NO)Cl2(κ3N4,N8,N11(1-carboxypropyl)cyclam)]Cl·H2O
Source: Royal Society of Chemistry journal article supplement (doi:10.1039/c0dt01541e), 2011-01-01
Supplement: c0dt01541e.pdf [file c0dt01541e.pdf]

## Supplementary Information

### Reactivity, Photolability, and Computational Studies of the Ruthenium Nitrosyl Complex with a Substituted Cyclam

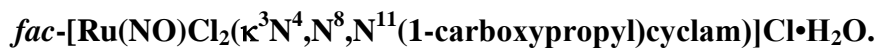

Fabio G. Doro<sup>a,d</sup>, Iuri M. Pepe<sup>b</sup>, Sergio E. Galembeck<sup>a</sup>, Rose M. Carlos<sup>c</sup>, Zenis N.  
da Rocha<sup>d</sup>, Mauro Bertotti<sup>e</sup> and Elia Tfouni<sup>a\*</sup>

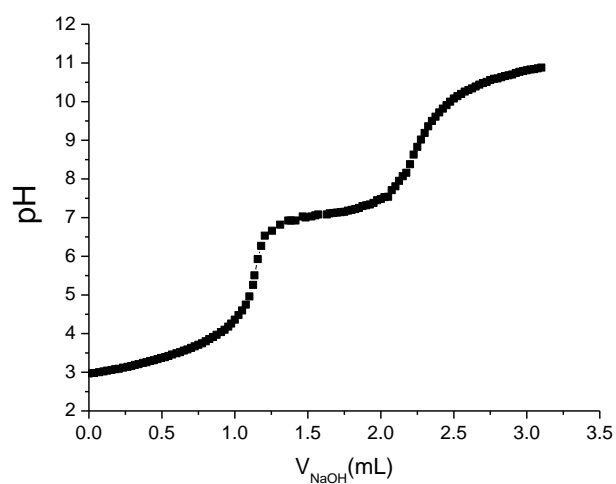

**Fig. SI 1** Representative titration curve for **I** ( $2.0 \times 10^{-3} \text{ mol L}^{-1}$ ,  $\mu = 0.1 \text{ mol L}^{-1} \text{ NaCl}$ ) with  $0.025 \text{ mol L}^{-1} \text{ NaOH}$  at room temperature.

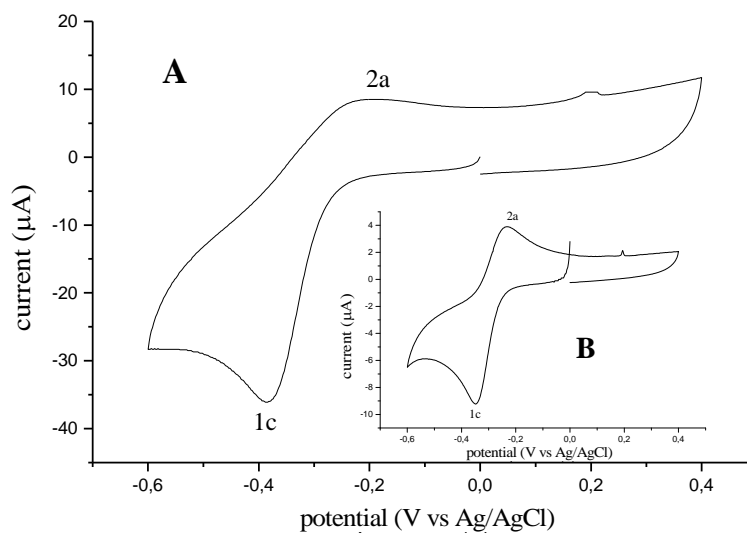

**Fig. SI 2** Cyclic voltammogram of **I** in NaCl 0.1 mol L<sup>-1</sup>, pH 4.7 and T = 25 °C. (A) scan rate of 200 mV s<sup>-1</sup> and (B) 20 mV s<sup>-1</sup>

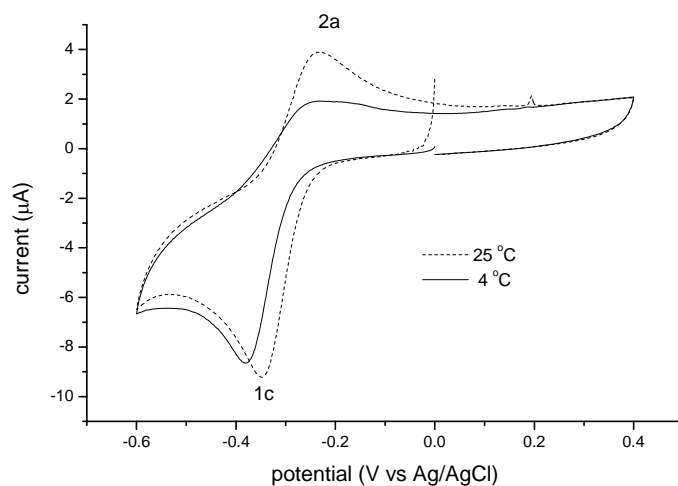

**Fig. SI 3** Cyclic voltammogram of **I** in NaCl 0.1 mol L<sup>-1</sup>, pH 4.7 and scan rate of 20 mV s<sup>-1</sup> at different temperatures.

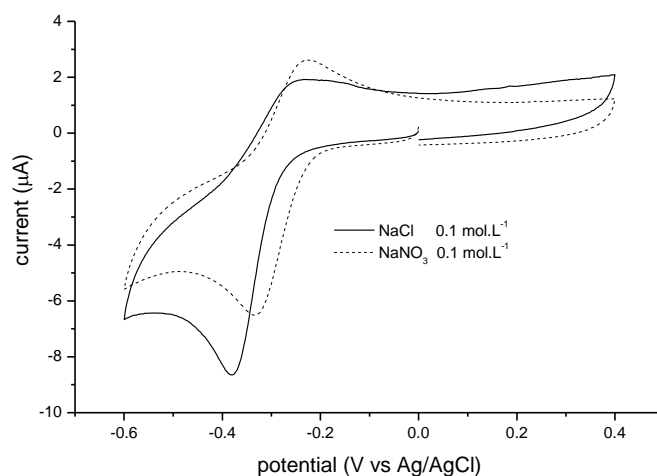

**Fig. SI 4** Cyclic voltammogram of **I** at pH 4.7 and  $T = 4\text{ }^{\circ}\text{C}$  with scan rate of  $20\text{ mV s}^{-1}$ .

### Computational models

Initially, the geometry of the complex *fac*-[Ru(NO)Cl<sub>2</sub>(κ<sup>3</sup>N<sup>4</sup>,N<sup>8</sup>,N<sup>11</sup>(1-carboxypropyl)cyclam)]Cl•H<sub>2</sub>O was optimized using some theoretical models (method, basis set for representative atoms, and a pseudopotential (PP) for ruthenium), and compared with the experimental geometry. The model will be indicated by method/PP, basis. The calculations were carried out by BP86<sup>1,2</sup> and B3LYP<sup>3</sup> functionals, 6-31G(d),<sup>4</sup> 6-31+G(d,p),<sup>5</sup> cc-pVDZ,<sup>6,7</sup> and aug-cc-pVDZ<sup>8</sup> basis sets, and ECP28MHF, non relativistic, or ECP28MDF,<sup>9</sup> fully relativistic PPs. The best results were obtained by the B3LYP method, ECP28MDF PP and cc-pVDZ basis set, B3LYP/ECP28MDF,cc-pVDZ.

**Table SI 1** Deviations of calculated bond lengths from experimental ones for complex **I**, Å. M1: B3LYP/ECP28MHF,6-31G(d); M2: B3LYP/ECP28MHF,6-31+G(d,p); M3: B3LYP/ECP28MDF, cc-pVDZ; M4: BP86/ECP28MDF,cc-pVDZ.

|                             | M1    | M2    | M3    | M4    |
|-----------------------------|-------|-------|-------|-------|
| all bond lengths            |       |       |       |       |
| mean                        | 0.018 | 0.018 | 0.014 | 0.020 |
| std. dev.                   | 0.019 | 0.018 | 0.019 | 0.016 |
| only Ru-X <sup>a</sup>      |       |       |       |       |
| mean                        | 0.037 | 0.037 | 0.033 | 0.030 |
| std. dev.                   | 0.026 | 0.026 | 0.030 | 0.026 |
| max. dev.                   | 0.062 | 0.061 | 0.065 | 0.059 |
| excluding Ru-X <sup>a</sup> |       |       |       |       |
| Mean                        | 0.013 | 0.012 | 0.009 | 0.017 |
| std. dev.                   | 0.011 | 0.010 | 0.009 | 0.010 |
| max. dev.                   | 0.040 | 0.041 | 0.023 | 0.041 |

a: all bond lengths that involve ruthenium.

**Table SI 2** Bond angles for **I-VII**, in degrees, calculated in vacuum.

|            | (I)    | (II)   | (III)  | (IV)   | (V)    | (VI)   | (VII)  |
|------------|--------|--------|--------|--------|--------|--------|--------|
| N5-Ru-N2   | 171.73 | 171.55 | 171.38 | 174.23 | 177.8  | 172.48 | 176.54 |
| N5-Ru-N1   | 103.80 | 103.50 | 103.56 | 103.96 | 101.69 | 102.44 | 100.73 |
| N2-Ru-N1   | 80.39  | 80.09  | 80.55  | 79.81  | 79.4   | 80.1   | 79.27  |
| N5-Ru-N3   | 101.93 | 101.50 | 104.24 | 99.46  | 98.22  | 103.55 | 94.67  |
| N2-Ru-N3   | 85.35  | 86.22  | 83.65  | 85.14  | 83.72  | 83.67  | 81.87  |
| N1-Ru-N3   | 86.55  | 87.58  | 83.27  | 84.98  | 87.44  | 84.9   | 85.55  |
| N5-Ru-Cl1  | 89.55  | 88.83  | 90.96  | 91.71  | 86.94  | 90.95  | 89.54  |
| N2-Ru-Cl1  | 83.36  | 83.53  | 81.63  | 83.80  | 91.18  | 82.06  | 93.92  |
| N1-Ru-Cl1  | 88.62  | 88.96  | 87.00  | 91.10  | 88.66  | 87.4   | 88.93  |
| N3-Ru-Cl1  | 168.30 | 169.61 | 169.16 | 168.76 | 174.07 | 164.75 | 173.59 |
| N5-Ru-Cl2  | 87.32  | 87.51  | 87.17  | 87.37  | 86.06  | 87.82  | 86.55  |
| N2-Ru-Cl2  | 88.51  | 88.83  | 88.16  | 89.01  | 92.88  | 89.45  | 93.46  |
| N1-Ru-Cl2  | 168.89 | 168.93 | 169.16 | 168.56 | 172.23 | 169.51 | 172.73 |
| N3-Ru-Cl2  | 92.05  | 91.77  | 95.74  | 91.70  | 90.93  | 94.89  | 93.74  |
| Cl1-Ru-Cl2 | 90.66  | 89.75  | 91.31  | 90.10  | 92.33  | 90.31  | 91.33  |
| O5-N5-Ru   | 170.13 | 169.50 | 170.87 | 170.81 | 176.73 | 171.77 | 122.00 |

## References

1. A. D. Becke, *Phys. Rev. A*, 1988, **38**, 3098.
2. J. P. Perdew, *Phys. Rev. B*, 1986, **33**, 8822.
3. A. D. Becke, *J. Chem. Phys.*, 1993, **98**, 5648.
4. W. J. Hehre, R. Ditchfie and J. A. Pople, *J. of Chem. Phys.*, 1972, **56**, 2257.
5. P. C. Harihara, J. A. Pople, *Theor. Chim. Acta*, 1973, **28**, 213.
6. T. H. Dunning, *J. Chem. Phys.*, 1989, **90**, 1007.
7. K. A. Peterson, D. E. Woon and T. H. Dunning, *J. Chem. Phys.*, 1994, **100**, 7410.
8. R. A. Kendall, T. H. Dunning and R. J. Harrison, *J. Chem. Phys.*, 1992, **96**, 6796.
9. K. A. Peterson, D. Figgen, M. Dolg and H. Stoll, *J. Chem. Phys.*, 2007, **126**.
